# Supplementary material for: Immunization with a Synthetic Helicobacter pylori Peptide Induces Secretory IgA Antibodies and Protects Mice against Infection
Source: Can J Infect Dis Med Microbiol. 2019 Apr 1;2019:8595487. doi: 10.1155/2019/8595487 (PMC6466936; doi:10.1155/2019/8595487)
Supplement: Supplementary Materials — Spleen weights Student's t-test analysis: a Student's t-test analysis of spleen weights between immunized and control groups is depicted. One-way ANOVA test for peptide-immunization lymphoproliferation data: an ANOVA test for data related to the effect of peptide immunization on thymus lymphocyte proliferation, as compared with controls was performed. One-way ANOVA test for peptide-immunization and ConA-mediated lymphoproliferation data: an ANOVA test for data related to the effect of peptide immunization on concanavalin A-mediated thymus lymphocyte proliferation, as compared with controls, was performed. One-way ANOVA test for IL-6 production: an ANOVA test for data related to the effect of peptide immunization on IL-6 production, as compared with controls, was developed. [file 8595487.f1.zip]

Archive with 4 entries (4 files):
- 8595487.f1/One-Way ANOVA IL-6 analysis_CJIDMM_2669704.pdf
- 8595487.f1/One-Way ANOVA-PROLIFERARION PEPTIDE ANALYSIS_CJIDMM_2669702.pdf
- 8595487.f1/One-Way ANOVA-PROLIFERATION CONCANAVALIN-A ANALYSIS_CJIDMM_2669703.pdf
- 8595487.f1/Spleen Weight t test analysis_CJIDMM_2669701.pdf
